# Supplementary material for: Cognitive Ageing in Great Britain in the New Century: Cohort Differences in Episodic Memory
Source: PubMed Central journal article supplement (PMC4699214; doi:10.1371/journal.pone.0144907), 2015-12-29
Supplement: pone.0144907.s001.pdf [file pone.0144907.s001.pdf]

## Cognitive ageing in Great Britain in the new century: Supplementary Tables

Gindo Tampubolon<sup>1</sup>

**1 University of Manchester**

**Table 1. Sensitivity analysis using decadal cohorts (ELSA 2002-2013)**

| Predictors             | Episodic memory |                     |
|------------------------|-----------------|---------------------|
|                        | Coeff.          | Std. error          |
| Constant               | -6.9057         | 0.8725              |
| Age                    | 0.4097          | 0.0270 <sup>†</sup> |
| Age <sup>2</sup>       | -0.0033         | 0.0002 <sup>†</sup> |
| Cohort 60s             | 0.8093          | 0.1110 <sup>†</sup> |
| Cohort 70s             | 1.6935          | 0.1235 <sup>†</sup> |
| Cohort 80s             | 2.9422          | 0.1337 <sup>†</sup> |
| Female                 | 0.7232          | 0.0467 <sup>†</sup> |
| Intermediate           | 0.9496          | 0.0578 <sup>†</sup> |
| Managerial             | 1.1044          | 0.0547 <sup>†</sup> |
| Married/cohab.         | -0.0345         | 0.0435              |
| College                | 0.9514          | 0.0542 <sup>†</sup> |
| Middle tertile         | 0.1710          | 0.0370 <sup>†</sup> |
| Top tertile            | 0.3484          | 0.0424 <sup>†</sup> |
| Ethnic minority        | -1.4015         | 0.1377 <sup>†</sup> |
| Social connect.        | 0.0710          | 0.0184 <sup>†</sup> |
| Physical problem       | -0.0385         | 0.0062 <sup>†</sup> |
| Hypertensives          | -0.0754         | 0.0381              |
| Diabetes               | -0.1747         | 0.0624 <sup>†</sup> |
| Cancer                 | 0.0793          | 0.0637              |
| CVD                    | 0.0290          | 0.0473              |
| Stroke                 | -0.6062         | 0.0889 <sup>†</sup> |
| Arthritis              | 0.2173          | 0.0404 <sup>†</sup> |
| Smoker                 | -0.0403         | 0.0435              |
| Drink regularly        | 0.4743          | 0.0508 <sup>†</sup> |
| Exercise mod.          | 0.2554          | 0.0348 <sup>†</sup> |
| Exercise vig.          | 0.1043          | 0.0325 <sup>†</sup> |
| CESD                   | -0.0770         | 0.0083 <sup>†</sup> |
| Practice               | 0.6392          | 0.0722 <sup>†</sup> |
| Within-person $\sigma$ | 0.8043          | 0.1348 <sup>†</sup> |
| $R^2$                  | 0.531           |                     |

<sup>†</sup>  $p < 0.01$ .
